# Supplementary material for: Efficacy of cattle encephalon glycoside and ignotin in patients with acute cerebral infarction: a randomized, double-blind, parallel-group, placebo-controlled study
Source: PubMed Central journal article supplement — Neural Regen Res. 2020 Jan 9;15(7):1266–73. doi: 10.4103/1673-5374.272616 (PMC7047806; doi:10.4103/1673-5374.272616), 2020-01-09
Supplement: NRR-15-1266_Suppl1.pdf [file NRR-15-1266_Suppl1.pdf]

北京大学第三医院医学伦理委员会  
Peking University Third Hospital Medical Ethics Committee

伦理审查批件

Approval Notice

医伦审【2013】068(2)号

|         |                                                                                                                                                                                                                                                                        |         |
|---------|------------------------------------------------------------------------------------------------------------------------------------------------------------------------------------------------------------------------------------------------------------------------|---------|
| 项目编号    | 2013068                                                                                                                                                                                                                                                                |         |
| 项目名称    | 脑苷肌肽注射液治疗急性脑梗死引起的中枢神经损伤的有效性和安全性随机、双盲、安慰剂平行对照、多中心临床试验                                                                                                                                                                                                                   |         |
| 申办科室    | 神经内科                                                                                                                                                                                                                                                                   |         |
| 我院主要研究者 | 姓名：樊东升                                                                                                                                                                                                                                                                 | 职称：主任医师 |
| 审查方式    | 快速审查 ( <input checked="" type="checkbox"/> “修改后同意”项目复审 <input type="checkbox"/> 修正案审查 )                                                                                                                                                                                |         |
| 审查委员人数  | 1 名                                                                                                                                                                                                                                                                    |         |
| 审查文件    | <p>原文件 (注明文件名称、版本号、日期):</p> <p>临床试验方案 (YL-CTP-H22025046-B-V1.0/2013.03.31)</p> <p>知情同意书 (YL-ICF-H22025046-B-V1.0/2013.03.31)</p><br><p>修改后文件 (注明文件名称、版本号、日期):</p> <p>临床试验方案 (YL-CTP-H22025046-B-V2.0/2013.04.25)</p> <p>知情同意书 (YL-ICF-H22025046-B-V2.0/2013.04.25)</p> |         |



|                                                                                                           |                                                                                                                                                                                                                                                                                                                                                                                                                                                                                                                                                             |                                                                                                                   |
|-----------------------------------------------------------------------------------------------------------|-------------------------------------------------------------------------------------------------------------------------------------------------------------------------------------------------------------------------------------------------------------------------------------------------------------------------------------------------------------------------------------------------------------------------------------------------------------------------------------------------------------------------------------------------------------|-------------------------------------------------------------------------------------------------------------------|
| <p>审查声明</p>                                                                                               | <p>确认伦理委员会组成和执行符合中华人民共和国卫生部2007年颁布实施的《涉及人的生物医学研究伦理审查办法（试用）》以及《赫尔辛基宣言》和国际医学科学组织委员会颁布的《人体生物医学研究国际道德指南》的伦理原则。</p> <p>A statement confirming that the Ethics Committee is organized and operates according to <i>Biomedical Research Ethics Review involving human</i> which is passed by Ministry of Health in 2007, <i>Helsinki Declaration</i> and ethical principles of <i>International ethical guidelines for biomedical research involving human subjects</i> which is passed by Council for International Organizations of Medical Science (CIOMS).</p> |                                                                                                                   |
| <p>快速审查意见</p>                                                                                             | <p>具体意见如下：</p> <p style="text-align: center;"><b>已按伦理会意见修改，同意开展研究。</b></p> <p>如果对审查意见有不同观点，请书面向伦理委员会反映。</p>                                                                                                                                                                                                                                                                                                                                                                                                                                                 |                                                                                                                   |
| <p>主任委员<br/>(签名): </p> | <p>签发日期：<br/>2013年5月20日</p>                                                                                                                                                                                                                                                                                                                                                                                                                                                                                                                                 | <p>北京大学第三医院<br/>医学伦理委员会 </p> |

医学伦理委员会地址：北京市海淀区花园北路49号，邮编：100191  
 科研伦理综合办公室联系人：洪老师  
 联系电话：010-82265571, 82265883  
 传真：010-82265571
