# Supplementary material for: Efficacy of cattle encephalon glycoside and ignotin in patients with acute cerebral infarction: a randomized, double-blind, parallel-group, placebo-controlled study
Source: PubMed Central journal article supplement — Neural Regen Res. 2020 Jan 9;15(7):1266–73. doi: 10.4103/1673-5374.272616 (PMC7047806; doi:10.4103/1673-5374.272616), 2020-01-09
Supplement: NRR-15-1266_Suppl2.pdf [file NRR-15-1266_Suppl2.pdf]

## 脑昔肌肽注射液治疗急性脑梗死引起的中枢神经损伤的临床研究 受试者知情同意书—告知页

尊敬的受试者：

我们将邀请您参加一项脑昔肌肽注射液治疗急性脑梗死引起的中枢神经损伤的临床研究，以评价该药治疗急性脑梗死引起的中枢神经损伤的有效性和安全性。药物通过静脉滴注途径给药。

在您决定是否参加这项研究之前，请仔细阅读以下内容，它可以帮助您了解该项研究以及为什么要进行这项研究，研究的程序和期限。参加研究后可能给您带来的益处、风险和不适。

以下是本项研究的介绍：

### 一、研究背景

北京大学第三医院神经内科樊东升教授将开展这项由吉林四环制药有限公司资助的研究。脑昔肌肽注射液为国药准字号药物，为评价脑昔肌肽注射液治疗急性脑梗死引起的中枢神经损伤的有效性和安全性而计划进行本研究。大约 320 人将参与在 16 个不同的医院开展的本项研究，大约 8 人会在北京大学第三医院参与本研究。该研究已经得到临床研究负责单位北京大学第三医院伦理委员会的批准，伦理批件号：2013068。

本品为复方制剂，系由健康家兔肌肉提取物和牛脑神经节苷脂提取物混合制成的无菌水溶液。其主要组份为多肽、多种神经节苷脂、游离氨基酸、核酸等。每 1ml 含多肽 3.2mg、神经节苷脂（以唾液酸计）50 $\mu$ g、游离氨基酸 1.65mg、总氮 0.925mg、核酸 0.3mg。辅料：注射用水。功能主治：用于治疗脑卒中、老年性痴呆、新生儿缺氧缺血性脑病、颅脑损伤、脊髓损伤及其它原因引起的中枢神经损伤。用于治疗创伤性周围神经损伤、糖尿病周围神经病变、压迫性神经病变等周围神经损伤。

### 二、哪些人不宜参加本项研究

1. 短暂性脑缺血发作、非责任病灶的腔隙性脑梗死、脑梗死后脑出血、蛛网膜下腔出血及后循环缺血的患者；

2. 经检查证实由脑肿瘤、脑外伤、脑寄主虫病、代谢障碍所引起的偏瘫，风心病、冠心病及其它心脏病合并房颤所引起的脑栓塞者；

3. 神经节苷脂累积病（如家族性黑蒙性痴呆）患者；

4. 溶栓患者；

5. 消化道溃疡不能服用阿司匹林的患者；

6. 合并有心血管、肝（ALT或AST $>$ 1.5倍正常值上限）、肾（BUN $>$ 1.2倍正常值上限，Cr $>$ 正常值上限）、内分泌系统和造血系统等严重原发性疾病患者；

7. 对蛋白质过敏、对试验药物过敏者；

8. 药物或酒精依赖者；

9. 意向妊娠或育龄妇女妊娠试验阳性及哺乳期妇女；

10. 近 3 个月内参加其它临床试验者；

11. 研究者认为不适宜参加临床试验的患者。

### 三、如果参加研究需要做什么

1. 如果您同意参加本研究，请您签署这份知情同意书。在入选本项研究前，您将接受以下检查以确定是否可以参加研究：①医生将询问、记录病史、并进行体格检查。②血常规、尿常规、便常规、心电图、肝（ALT、AST、ALP、GGT、TbIL）、肾功能（BUN、Cr）、头颅 CT、妊娠试验（育龄妇女）等检查。其中血常规检查和肝肾功能检查需要抽血 1 次，抽血量 10ml 左右。

2. 筛选后，如果您符合入选条件，将根据计算机提供的随机数字，决定您接受脑昔肌肽注射液（试验组）或脑昔肌肽注射液模拟剂（对照组，模拟剂为灭菌注射用水，两组药物均由吉林四环制药有限公司生产）的治疗。参加这项研究的患者将按 3: 1 的比例被分入这两个不同的治疗组。两组均使用基础治疗药物阿司匹林肠溶片、丹参酮 II A 磺酸钠注射液和阿托伐他汀钙片。治疗观察将持续 2 周。您和您的医生将无法事先知道和选择哪一种治疗药物。

3.您需要每日规范使用药物治疗，并按时复诊。

4.用药后7天，医生将询问并记录您病情的变化。

5.用药治疗满14天，医生将询问记录您病情的变化，进行体格检查，还将做血、尿、便常规、心电图、肝肾功能等理化检查。其中血常规检查和肝肾功能检查需要抽血1次，抽血量10ml左右。

6.治疗结束后3个月，请您按医生和您约定的访视时间来医院复诊，这对于本项研究非常重要，因为医生将判断您所接受的治疗是否真正起到作用。

#### 四、研究中可能的受益

如果您同意参加本研究，您将可能从本项研究中受益，此种受益包括：

1. 病情有可能获得改善；

2. 治疗期内，所用试验药物、基础治疗药物和治疗结束时进行的血常规、尿常规、便常规、心电图、肝（ALT、AST、ALP、GGT、TbIL）、肾功能（BUN、Cr）等理化检查均为免费。

同时，我们希望从您参与的本研究中得到的信息在将来能够使与您病情相同的病人获益。

#### 五、关于研究费用

本项研究中所使用的试验药物脑苷肌肽注射液以及基础用药阿司匹林肠溶片、丹参酮IIA 磺酸钠注射液和阿托伐他汀钙片均由资助方吉林四环制药有限公司免费提供。入选本研究前进行的血常规、尿常规、便常规、心电图、肝（ALT、AST、ALP、GGT、TbIL）、肾功能（BUN、Cr）、头颅CT等检查是您入院时的常规检查，费用将由您自行承担。治疗结束后所进行的血常规、尿常规、便常规、心电图、肝（ALT、AST、ALP、GGT、TbIL）、肾功能（BUN、Cr）等检查费用，由资助方吉林四环制药有限公司提供。

#### 六、参加研究可能的不良反应、风险和不便

参加本研究可能给您带来的风险如下。

● 使用脑苷肌肽注射液可能引起的不良反应如下：

有个别患者静点3~4小时出现发冷、体温略有升高、头晕、烦躁；个别病例可引起过敏性皮疹，调慢滴速或停药后症状可自行消失。

● 使用基础用药阿司匹林肠溶片可能引起的不良反应如下：

常见的不良反应为胃肠道反应，如腹痛和胃肠道轻微出血，偶尔出现恶心，呕吐和腹泻。胃出血和胃溃疡以及主要在哮喘患者出现的过敏反应（呼吸困难和皮肤反应）极少见。有报道个别病例出现肝肾功能障碍、低血糖以及特别严重的皮肤病变（多形性渗出性红斑）。小剂量阿司匹林能减少尿酸的排泄，对易感者可引起痛风发作。极少数病例在长期服用拜阿司匹灵（阿司匹林肠溶片）后由于胃肠道隐匿性出血导致贫血，出现黑便（严重胃出血的症状）。出现眩晕和耳鸣时（特别是儿童和老人）可能为严重的中毒症状。如果出现以上没有列举的可疑不良反应时，请及时告诉医生或药剂师。一旦出现副作用，应立即停药并通知医生，以便医生能判断副作用的程度并采取必要的措施。

● 使用基础用药丹参酮IIA 磺酸钠注射液可能引起的不良反应如下：

个别有皮疹反应，停药后即可消失。

● 使用基础用药阿托伐他汀钙片可能引起的不良反应如下：

1、 该品最常见的不良反应为胃肠道不适，其他还有头痛、皮疹、头晕、视觉模糊和味觉障碍。

2、 偶可引起血氨基转移酶可逆性升高。

3、 少见的不良反应有阳痿、失眠。

4、 罕见的不良反应有肌炎、肌痛、横纹肌溶解，表现为肌肉疼痛、乏力、发烧，并伴有血肌酸磷酸激酶升高、肌红蛋白尿等，横纹肌溶解可导致肾功能衰竭，但较罕见。该品与免疫抑制剂、叶酸衍生物、烟酸、吉非罗齐、红霉素等合用可增加肌病发生的危险。

5、 有报道发生过肝炎、胰腺炎及过敏反应如血管神经性水肿。

如果在研究中您出现任何不适，或病情发生新的变化，或任何意外情况，均应及时通知医生，医生将对此做出判断和医疗处理。资助方吉林四环制药有限公司对您提供保险，对于发生与试验相关的损害承担治疗的费用及相应的经济补偿，并对研究者提供法律上与经济上的担保。

如果您正处于育龄期（包括闭经后 1 年内），将对您进行是否怀孕的检测，测试结果必须是阴性的，您才能继续参加本研究。

您在研究期间需要按时到医院复诊，这些都可能给您造成麻烦或带来不方便。

## 七、个人信息的保密

您的医疗记录（包括研究病历/CRF 及理化检查报告）将按规定保存在医院。研究者、资助方代表、伦理委员会和药品监督管理部门将被允许查阅您的医疗记录。任何有关本项研究结果的公开报告将不会披露您的个人身份。我们将在允许的范围内，尽一切努力保护您个人资料、医疗资料的隐私。

除本研究以外，有可能在今后的其他研究中会再次利用您的医疗记录。您现在也可以声明拒绝除本研究外的其它研究利用您的医疗记录。

## 八、您可以获得更多的信息

如果您有与本研究相关的任何问题，请联系您的医生或研究者，联系方式见医生签名页。

如果您有与自身权益相关的任何问题，或者您想反映参与本研究过程中的不满和忧虑，请联系北京大学第三医院科研伦理综合办公室，联系电话：010-82265571。

## 九、可以自愿选择参加研究和中途退出研究

是否参加本项研究完全取决于您的自愿。您可以拒绝参加此项研究，或在研究过程中的任何时间退出研究，这都不会影响您和医生的关系，都不会影响对您的医疗或有其他方面利益的损失。

医生出于对您的最大利益考虑，可能会随时中止您参加本项研究。

如果不参加本项研究，或中途退出，还有很多其它替代的治疗药物。您不必为了治疗您的疾病而必须选择参加本项研究。

如果您因为任何原因从研究中退出，您可能被询问有关使用研究药物情况。如果医生认为需要，您也可能被要求进行实验室检查和体格检查。

如果您选择参加本项研究，我们希望您能够坚持完成全部研究过程。

## 十、现在该做什么

是否参加本项研究由您自己决定。您可以和您家人或者亲友讨论后再做出决定。

在您做出参加研究的决定前，请尽可能向医生询问有关问题，直至您对本项研究完全理解。

感谢您阅读以上材料。如果您决定参加本项研究，请告诉医生，医生会为您安排一切有关研究的事务。

**请您保留这份资料。**

脑苷肌肽注射液治疗急性脑梗死引起的中枢神经损伤的临床研究

受试者知情同意书—签字页

**研究项目名称:** 脑苷肌肽注射液治疗急性脑梗死引起的中枢神经损伤的有效性和安全性随机、双盲、安慰剂平行对照、多中心临床试验

**申办单位:** 北京大学第三医院

**资助单位:** 吉林四环制药有限公司

**脑苷肌肽注射液批准文号:** 国药准字 H22025046

**同意声明:**

1. 我已阅读了上述有关本研究的介绍, 而且有机会就此研究与医生讨论并提出问题。我提出的所有问题都得到了满意的答复。

2. 我知道参加本研究的受益和风险。我知道参加研究是自愿的, 我确认已有充足的时间对此进行考虑, 而且明白:

(1) 我可以随时向医生咨询更多的信息;

(2) 我可以随时退出本研究, 而不会受到歧视和报复, 医疗待遇与权益不会受到影响;

(3) 我同样清楚, 如果我中途退出研究, 特别是由于药物的原因使我退出研究时, 我若将病情变化告诉医生, 完成相应的体检和理化检查, 这将对我和整个研究十分有利;

(4) 如果因病情变化需要采取任何其他的药物治疗, 我会在事先征求医生的意见, 或在事后如实告诉医生;

(5) 我同意药品监督管理部门, 伦理委员会或申办者代表查阅我的研究资料;

(6) 我同意 ( ) 除本研究以外的其它研究利用我的医疗记录。同意划“○”, 不同意划“×”。

最后, 我决定同意参加本项研究, 并保证尽量遵从医嘱。

**受试者签名:**

联系电话:

日期:     年   月   日

我确认已了解本研究的详细情况, 包括其权利以及可能的受益和风险, 并接受到一份签署过的知情同意书副本。

**医生签名:**

个人电话:

单位电话:

日期:     年   月   日
